# Supplementary material for: Genome analysis of Diploscapter coronatus: insights into molecular peculiarities of a nematode with parthenogenetic reproduction
Source: PubMed Central journal article supplement (PMC5483258; doi:10.1186/s12864-017-3860-x), 2017-06-24

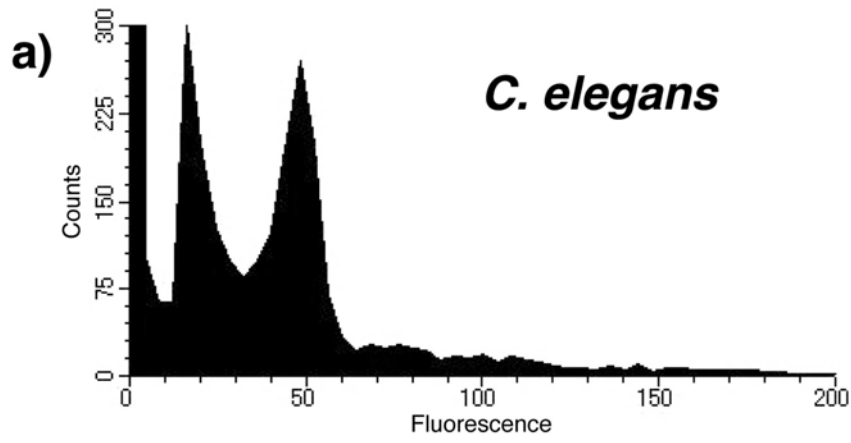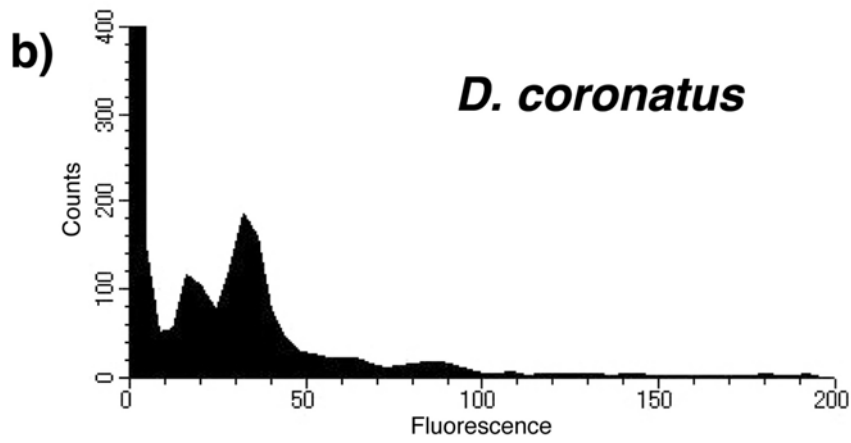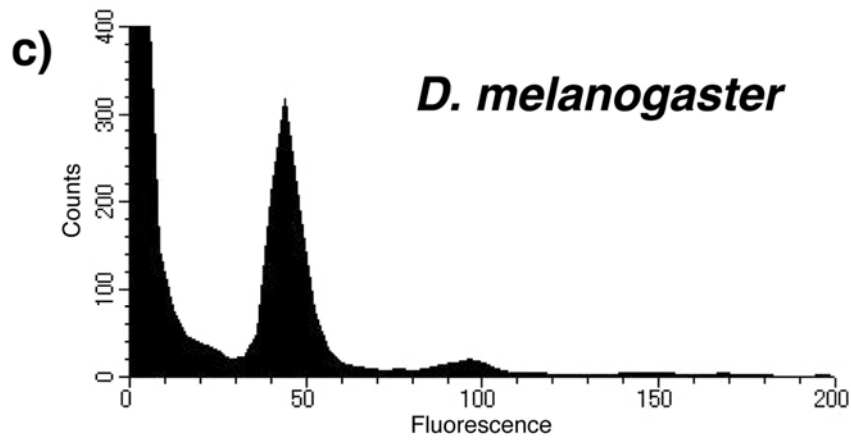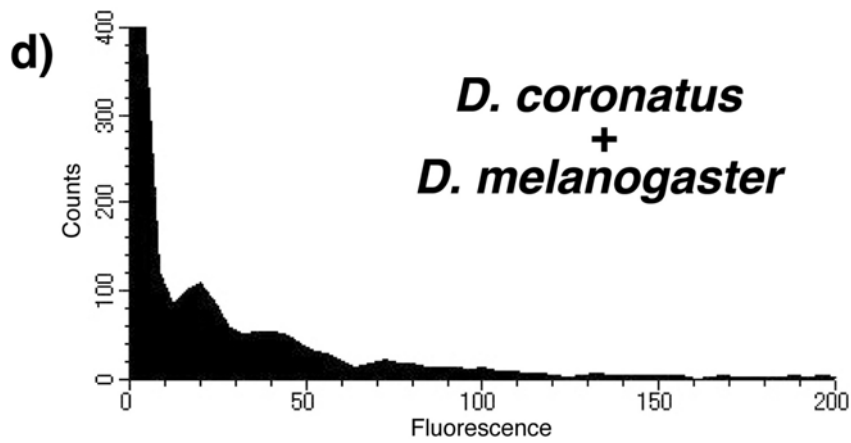

Supplement: 12864_2017_3860_MOESM5_ESM.pdf [file 12864_2017_3860_MOESM5_ESM.pdf]
