# Supplementary material for: Genome analysis of Diploscapter coronatus: insights into molecular peculiarities of a nematode with parthenogenetic reproduction
Source: PubMed Central journal article supplement (PMC5483258; doi:10.1186/s12864-017-3860-x), 2017-06-24

(1) MSH-2

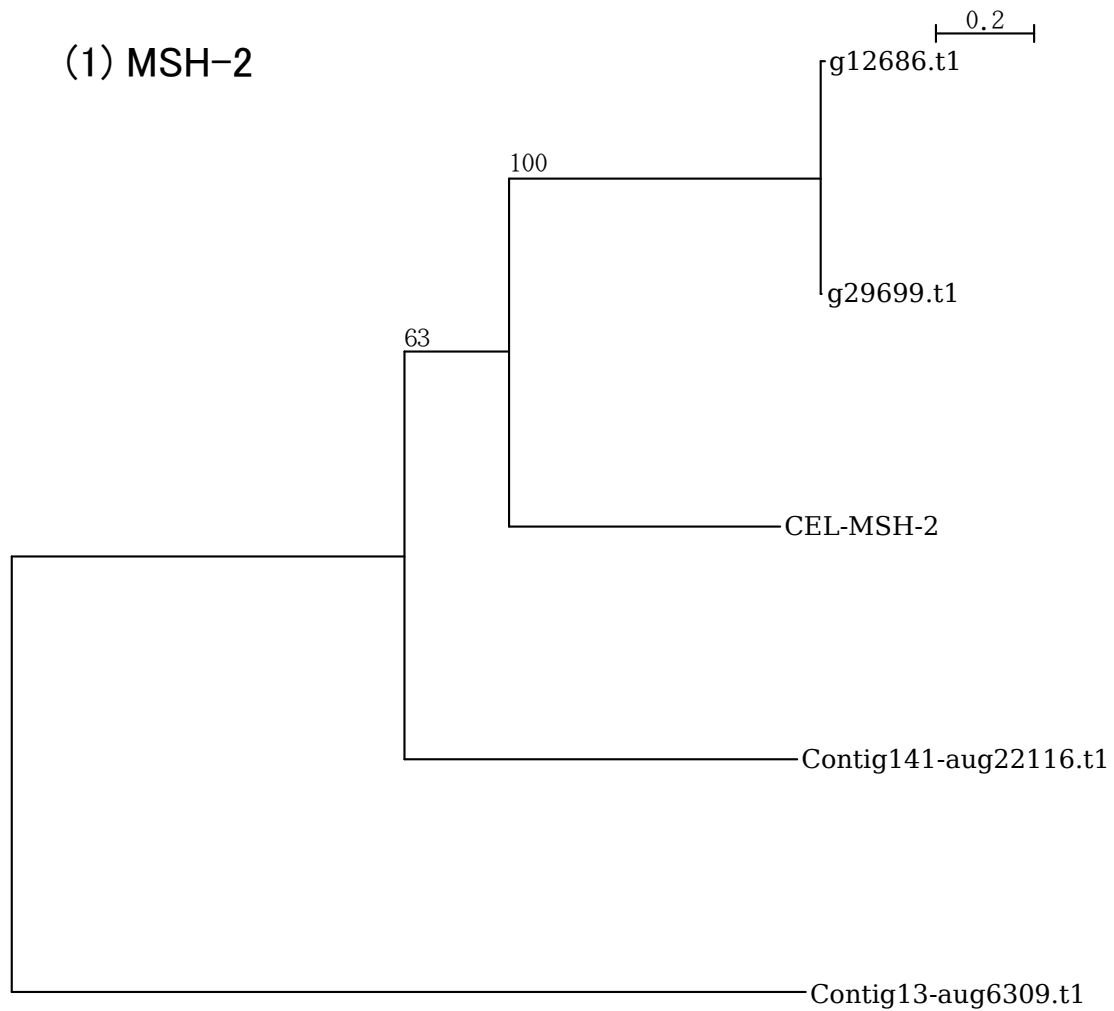

(2) MSH-5 (HIM-14)

0.1

Ppa-HIM-14

CEL-HIM-14

g20705.t1

g27186.t1

100

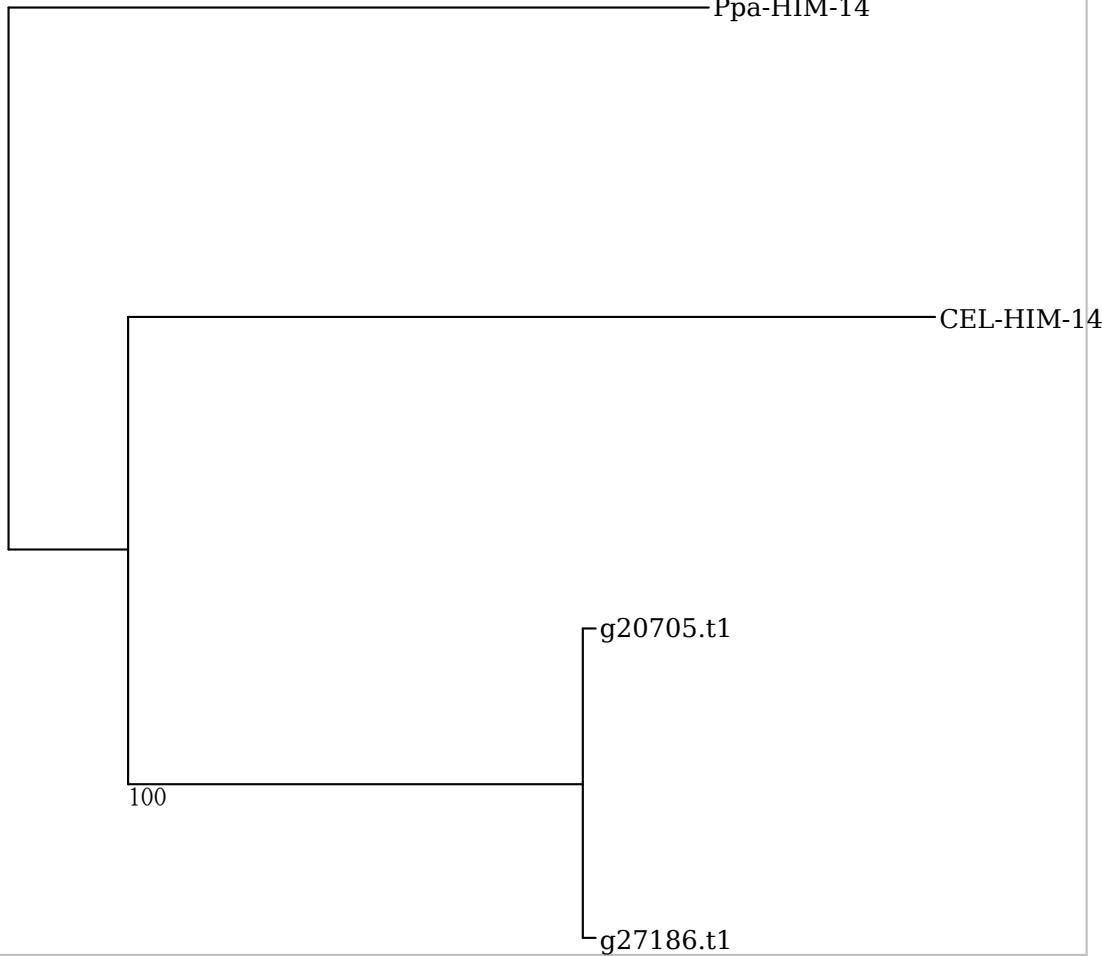

### (3) MSH-5

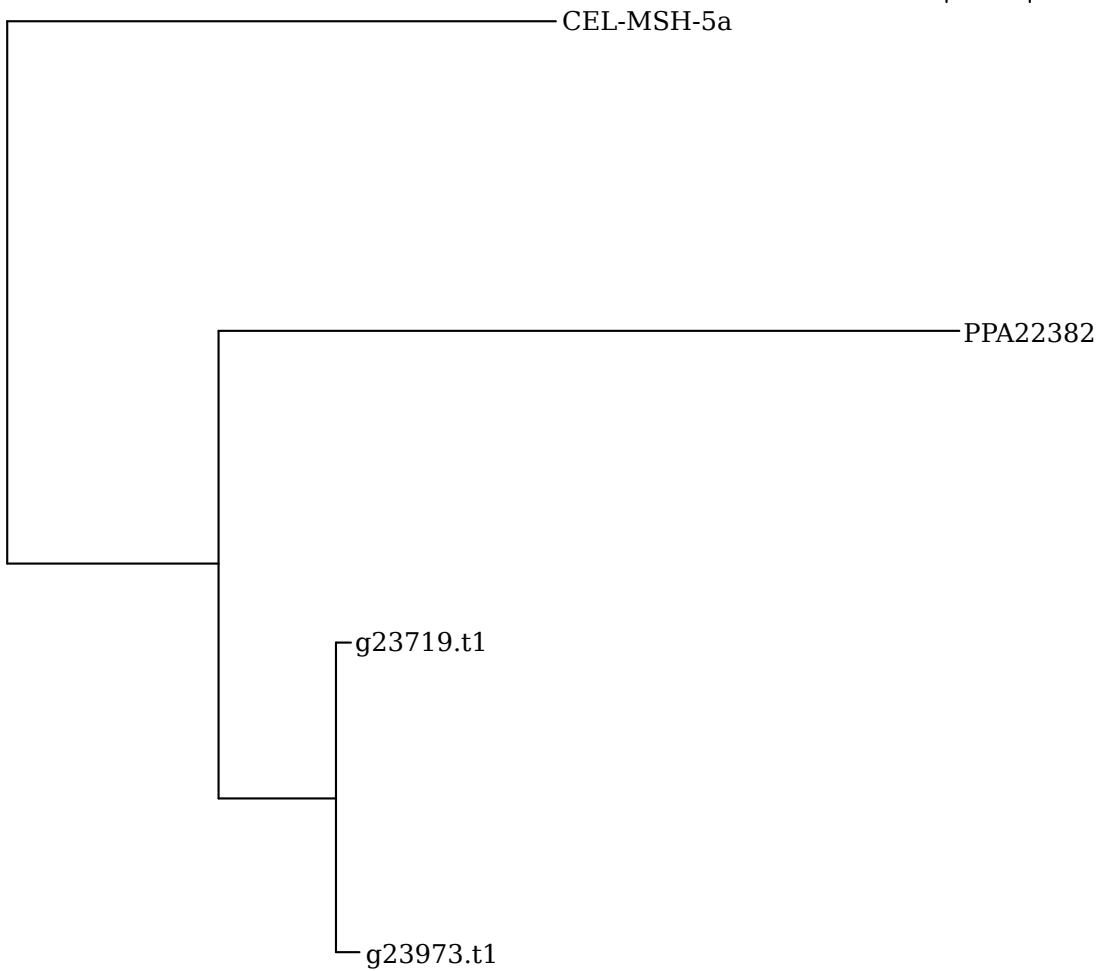

# (4) MSH-6

0.2

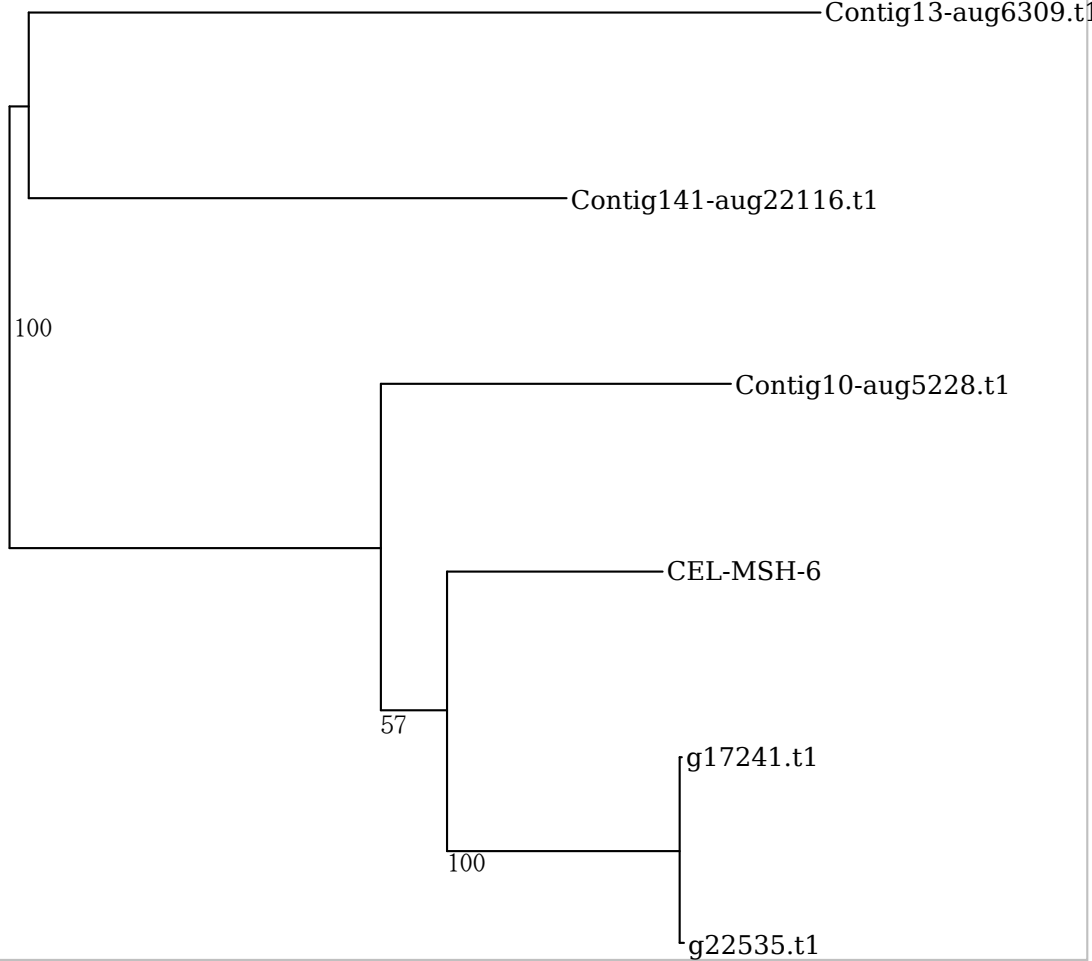

# (5) RAD-51

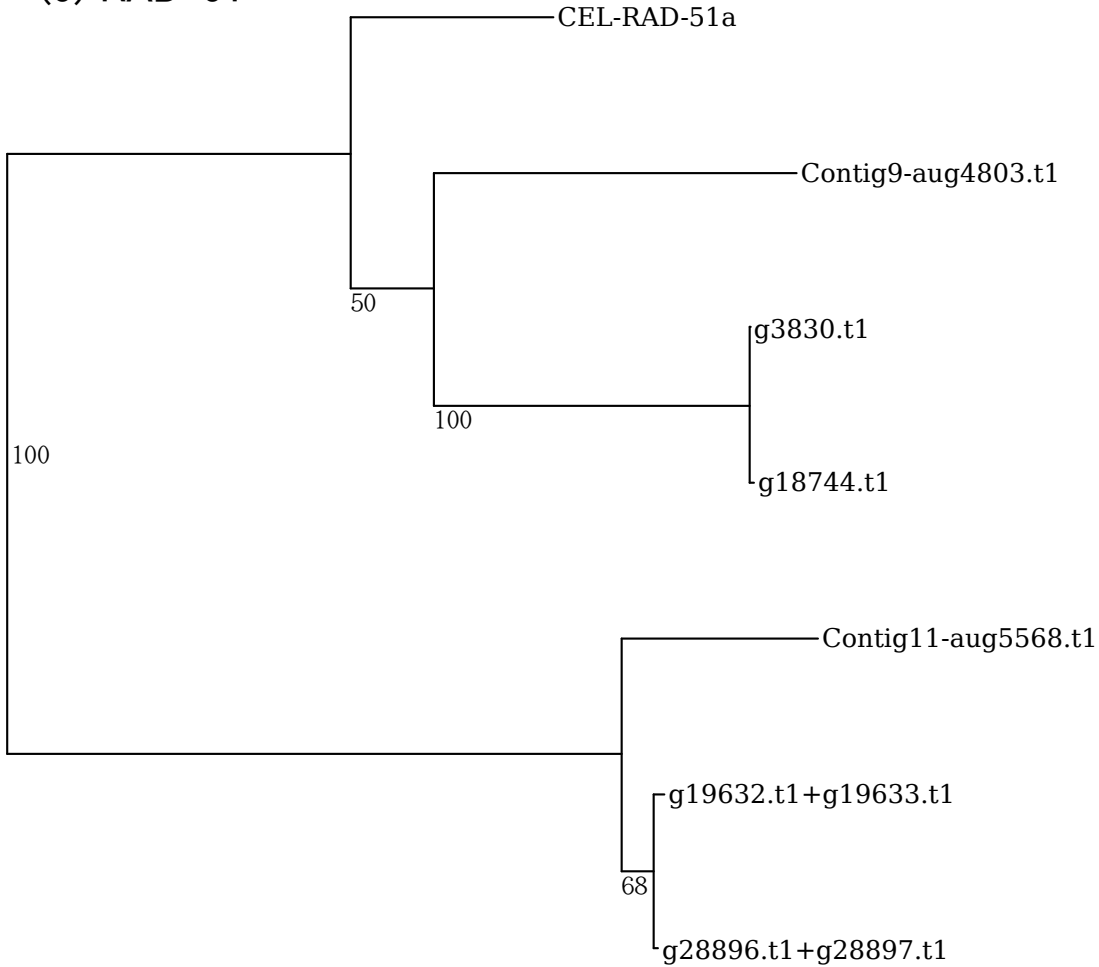

# (6) SPO-11

0.1

CEL-SPO-11a

Ppa-SPO-11

g26124.t1

97

g18275.t1

4

g26123.t1

34

g18276.t1

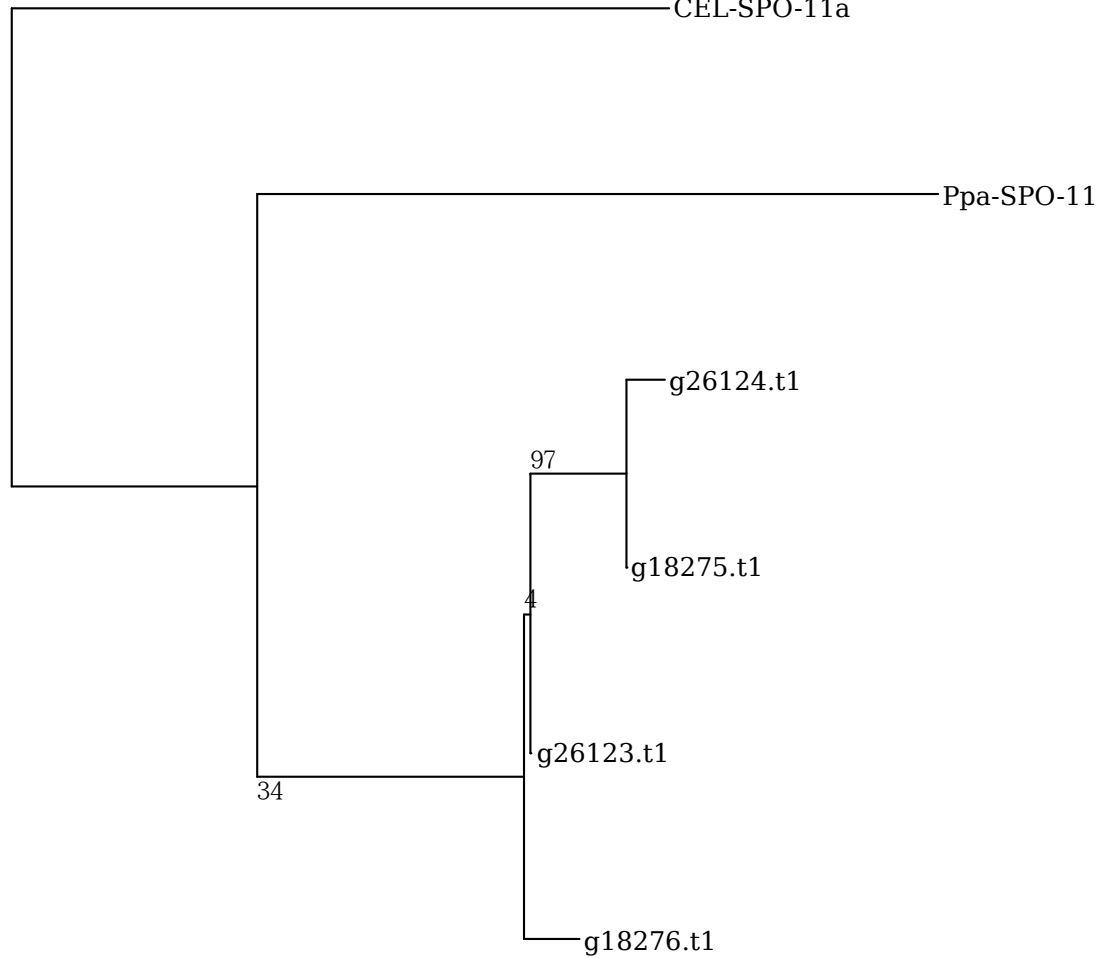

Supplement: 12864_2017_3860_MOESM11_ESM.pdf [file 12864_2017_3860_MOESM11_ESM.pdf]
